# Supplementary material
Source: PubMed Central journal article supplement (PMC6407131)
Supplement: NIHMS1009968-supplement-Suppl-Figures.pdf [file NIHMS1009968-supplement-Suppl-Figures.pdf]

# Supplementary Figure 1

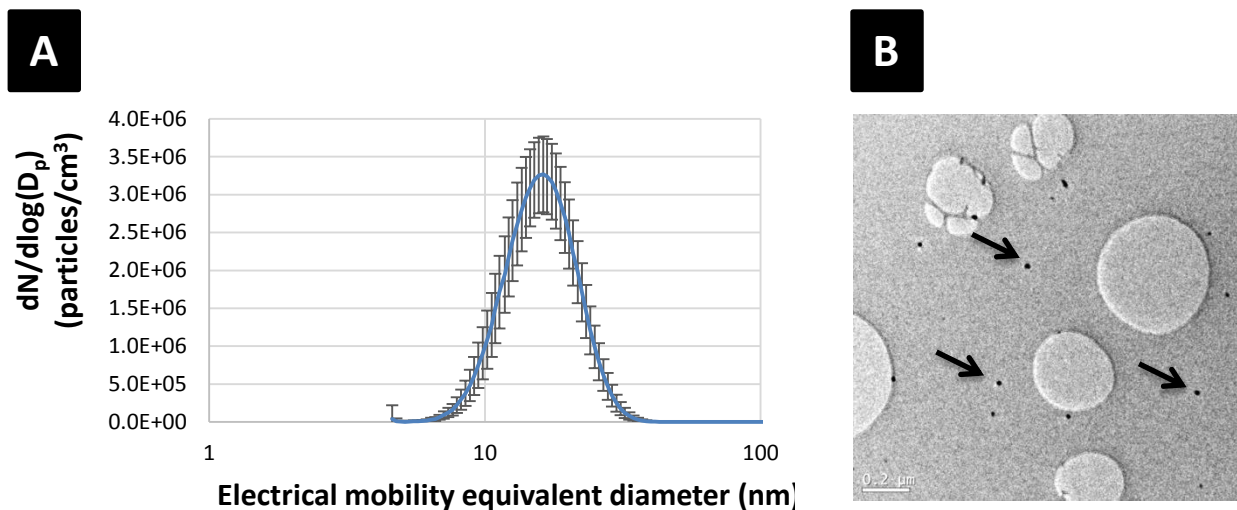

**Supplementary Figure 1** Characterisation of spark generated AgNP aerosols for in vitro exposures. (A) Average number-weighted aerosol size distribution for all exposures measured with an SMPS. (B) Representative TEM image of particles (indicated by arrows) deposited onto grids placed at the bottom of the wells (with no cells). Larger objects are part of grid structure.

# Supplementary Figure 2

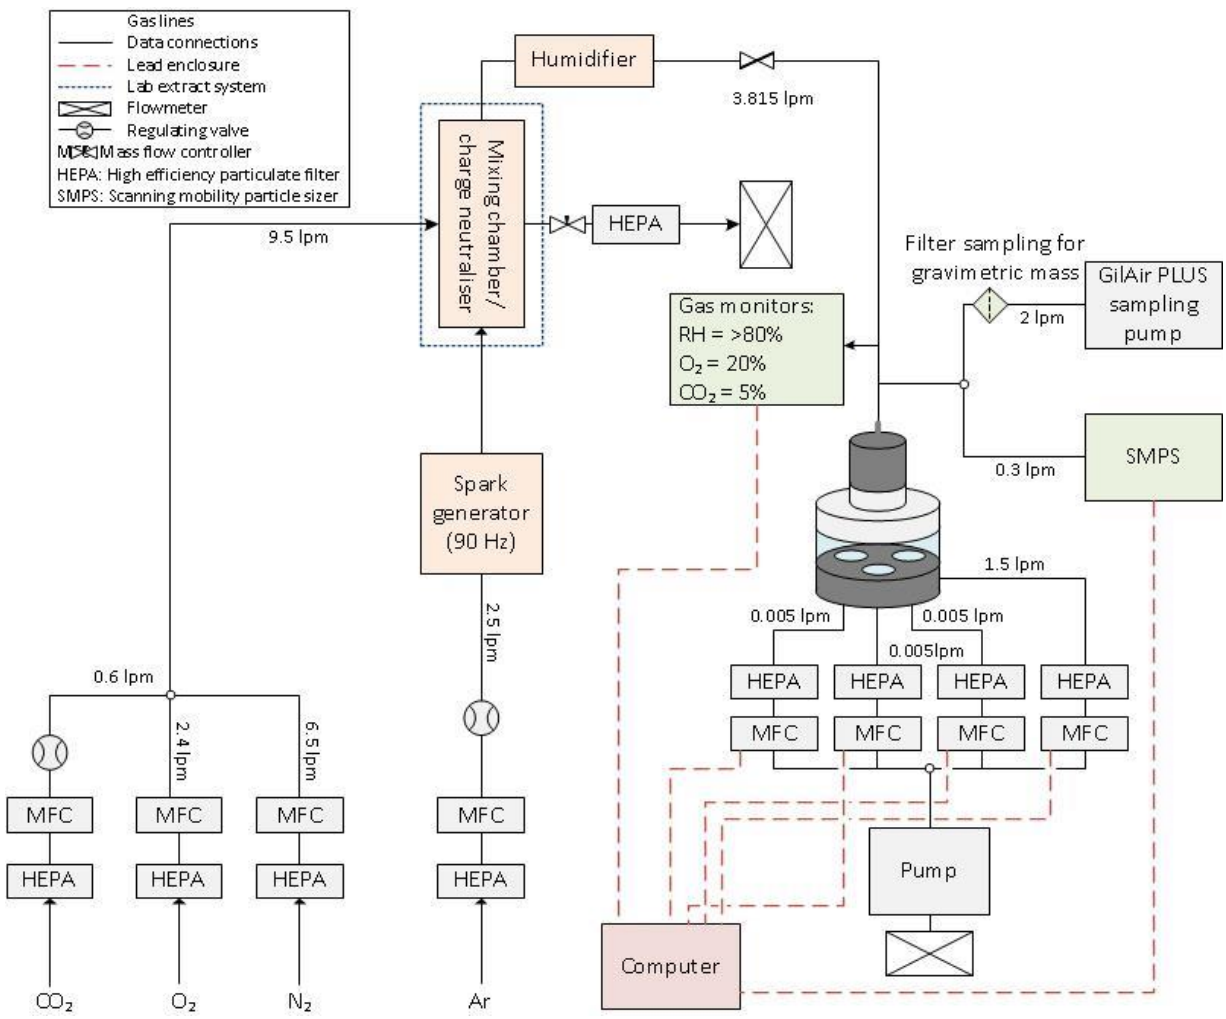

**AE-ALI System Schematic**

**Supplementary Figure 2** Aerosol-exposure air-liquid-interface (AE-ALI) system schematic

# Supplementary Figure 3 Full list of mRNA genes as identified as being involved in the in vivo pulmonary response elicited by deposited AgNPs, together with fold change for both Day 1 group comparison (Day 1 Air vs Day 1 NP) and Day 7 group comparison (Day 7 Air vs Day 7 NP).

| Feature ID            | Day 1 Change | Day 7 Change | Feature ID           | Day 1 Change | Day 7 Change | Feature ID           | Day 1 Change | Day 7 Change | Feature ID            | Day 1 Change | Day 7 Change |
|-----------------------|--------------|--------------|----------------------|--------------|--------------|----------------------|--------------|--------------|-----------------------|--------------|--------------|
| Osm1_1                | 88.8544      | 12.55123     | ENSRNOG00000021166_1 | 2.737471     | 3217183      | Advrn1_1             | 1.781103     | 1.069798     | Gtd80_1               | 1.240788     | 0.618567     |
| Sic7a6_1              | 29.9725      | 4.75062      | ENSRNOG00000031947_1 | 2.73084      | 0.52569      | Icos_1               | 1.778016     | 1.405462     | Sg6_1                 | 1.235099     | 2.03831      |
| Lnc2_1                | 27.30732     | 4.392821     | Ccnb1_1              | 2.721706     | 1.319167     | Rps24_1_1            | 1.777993     | 1.035938     | Pfpmr_1               | 1.221727     | 2.392864     |
| Ccrl5_1               | 23.09598     | 2.822472     | Cenp1_1              | 2.717151     | 1.57277      | ENSRNOG00000029996_1 | 1.775844     | 0.855833     | Hicr1b_1              | 1.216333     | 0.562804     |
| C12orf1_1             | 21.23532     | 1.805715     | Bubb1_1              | 2.697492     | 1.667492     | Cdrl1_1              | 1.77667      | 1.021929     | Hr1b_1                | 1.21232      | 2.304016     |
| RGD1565410_1          | 20.11676     | 4.56582      | Tnf1_1               | 2.68331      | 1.519515     | Mklnp_1              | 1.767993     | 1.285534     | RGD1309362_2_1        | 1.18889      | 0.553938     |
| Cd177_1               | 18.04014     | 3.186922     | Rasaf1_1             | 2.66576      | 1.23422      | C12orf1_1            | 1.769979     | 1.158450     | Gpr88_2_1             | 1.186754     | 1.590465     |
| ENSRNOG0000004783_1   | 17.68812     | 1.90965      | Ncapg_1              | 2.646523     | 1.566253     | Plazp7_1             | 1.766625     | 0.929237     | Rasl1_1               | 1.159305     | 1.953198     |
| Mmp12_1               | 15.19761     | 1.290658     | Tkl_1                | 2.611008     | 1.1165       | Myh7b_1              | 1.756313     | 1.338607     | Cmpk2_1               | 1.145533     | 0.64245      |
| C11orf1_1             | 15.04035     | 4.774685     | Sik7a3_1             | 2.592809     | 1.058214     | Gpr173_1             | 1.752292     | 0.979581     | Ghsp2_1               | 1.145159     | 0.575763     |
| Rnae9_1               | 11.14308     | 2.78411      | Pap1_1               | 2.585076     | 1.233005     | Incomp_1             | 1.742215     | 1.251885     | Ghsp7_1               | 1.142587     | 0.52888      |
| Retr1b_1              | 10.88788     | 2.026464     | Ckbl_1               | 2.582224     | 1.348277     | Wnt4_1               | 1.739791     | 1.006555     | Rasl1_1               | 1.139441     | 1.982555     |
| Ccrl1_1               | 10.49879     | 0.456        | Neil3_1              | 2.564941     | 1.008258     | Ube1c_1              | 1.73421      | 0.851225     | Shng11_1              | 1.121297     | 1.916033     |
| Spp1_1                | 9.797125     | 2.709457     | Mh2a_1               | 2.543        | 2.55241      | Patp1p_1             | 1.733564     | 1.118613     | Stat1_1               | 1.108462     | 0.626461     |
| Rnae11_1              | 9.580593     | 3.601424     | Nr4a1_1              | 2.52471      | 1.232871     | Cd81_1               | 1.730322     | 1.745173     | ENSRNOG00000049123_1  | 1.078041     | 2.579194     |
| H1r1_1                | 9.705997     | 1.920318     | Uhrf1_1              | 2.523856     | 1.083631     | Nr1h3_1              | 1.727936     | 1.45178      | ENSRNOG000000049123_1 | 1.073025     | 1.753536     |
| ENSRNOG00000048564_1  | 6.953763     | 0.600894     | Kntc1_1              | 2.510944     | 1.223838     | Sfnf13_1             | 1.726833     | 0.917871     | Sytl4_1               | 1.069661     | 2.85429      |
| Cd171_1               | 6.791436     | 1.385694     | Htt1_1               | 2.507374     | 1.364797     | SLC16A11_2           | 1.725855     | 1.578216     | Lay1_1                | 1.056757     | 1.710322     |
| Cd9p_1                | 6.643137     | 3.067617     | Chc1_1               | 2.495528     | 2.325628     | Gpr114_1             | 1.725025     | 0.856723     | Gbps_1                | 1.054554     | 0.541775     |
| Erf2_1                | 6.36432      | 2.369578     | Clec4a_1             | 2.489191     | 1.005        | Krt11h_1             | 1.711106     | 2.0462       | Plac8_1               | 1.054474     | 0.606693     |
| Gd7_1                 | 6.239028     | 1.374199     | Batf1_1              | 2.473033     | 1.057273     | Altp1a3_1            | 1.708759     | 0.76541      | Spre3_1               | 1.053783     | 1.790142     |
| Cd2_1                 | 6.162632     | 1.566707     | Bard1_1              | 2.462054     | 1.194864     | Myo12_1              | 1.70565      | 1.569995     | Hfr_1                 | 1.046221     | 1.63841      |
| Tfrc4_1               | 5.700971     | 1.414125     | Batf1_1              | 2.458225     | 0.853022     | Frs1_1               | 1.692408     | 1.279291     | Vaw1_1                | 1.027256     | 1.591024     |
| Sik7a11_1             | 5.517521     | 1.243218     | Ticrr_1              | 2.443311     | 1.313764     | MYO2_1               | 1.701172     | 1.299709     | Tap1_1                | 1.013891     | 0.644574     |
| Nkox1_1               | 5.375701     | 1.555907     | Cxcl10_1             | 2.432851     | 0.392828     | Hfr_1                | 1.699066     | 1.068119     | Cor1_1                | 1.013379     | 2.381957     |
| Rhsm2_1               | 5.317353     | 1.624125     | Hmox1_1              | 2.432147     | 1.142147     | Pfz1a1_1             | 1.698325     | 0.640355     | ENSRNOG00000002619_1  | 1.008214     | 1.898134     |
| ENSRNOG00000037076_1  | 5.154769     | 2.242089     | Trh1_1               | 2.41915      | 1.623908     | Hfr_1                | 1.696587     | 1.074481     | Sell_1                | 1.005638     | 0.613931     |
| Ccrl1_1               | 5.132187     | 1.520132     | Nkx211_1             | 2.41381      | 1.108802     | Tc2n_1               | 1.69494      | 1.335497     | Rnae6_1               | 0.993406     | 0.527607     |
| Fcar_1                | 5.113399     | 1.365593     | C4bp1_1              | 2.428947     | 1.363017     | Adrb2b_1             | 1.693531     | 1.535683     | Gkac_1                | 0.984578     | 1.542105     |
| NSD1568               | 4.978468     | 1.479648     | Fetua_2              | 2.410515     | 1.871736     | Mitf_1               | 1.686666     | 1.757198     | ENSRNOG00000000787_1  | 0.979993     | 1.537324     |
| Pcp2_1                | 4.860803     | 2.640328     | Gpr35_1              | 2.40852      | 2.23513      | Nkx1b_1              | 1.685305     | 1.148892     | Odn1_1                | 0.854599     | 0.613757     |
| C17orf28              | 4.774268     | 3.275195     | Mcm10_1              | 2.40577      | 1.290729     | Npm1b_1              | 1.685046     | 1.066638     | Nrcam_2               | 0.800058     | 2.860123     |
| Cd17orf4              | 4.774083     | 1.295295     | ENSRNOG00000031898_1 | 2.40577      | 1.290729     | Alm1_1               | 1.683323     | 1.067655     | ENSRNOG000000007087_1 | 0.799993     | 1.537324     |
| C20orf4               | 4.655239     | 2.141905     | Clec2d2_1            | 2.384891     | 0.967289     | Mnrl1_1              | 1.680126     | 1.05225      | ENSRNOG00000007238_1  | 0.776887     | 0.465424     |
| Mek1_1                | 4.686317     | 1.458866     | Rcat1_1              | 2.381367     | 1.293919     | Cks1b_1              | 1.676457     | 1.043034     | Kn3j_1                | 0.764748     | 0.468486     |
| Sht3p1_1              | 4.568796     | 1.317224     | Cep72_1              | 2.369808     | 1.401721     | Mbp_1                | 1.675771     | 0.816128     | Myh13_1               | 0.760396     | 2.600224     |
| Mab21b_1              | 4.498431     | 1.587283     | ENSRNOG00000002619_1 | 2.369808     | 1.401721     | Ncf1_1               | 1.674127     | 1.114734     | Nfya_1                | 0.742102     | 0.613931     |
| H1h1_1                | 4.46093      | 3.53207      | C12orf1_1            | 2.356604     | 0.974413     | P7256_1              | 1.672556     | 1.199249     | Nf1c1_1               | 0.724373     | 0.385713     |
| Ube2c_1               | 4.31863      | 1.357182     | Tmem171_1            | 2.350225     | 1.838113     | Entpd3_1             | 1.672227     | 1.366902     | Hmbox2_1              | 0.718209     | 0.380261     |
| Exo1_1                | 4.264873     | 1.42368      | Tnfrsf9_1            | 2.348629     | 1.164202     | ENSRNOG00000038375_1 | 1.670834     | 0.980176     | Pfz1_1                | 0.714116     | 0.438069     |
| 1700061919R1_1        | 4.26285      | 1.247955     | Hsk_1                | 2.348184     | 2.536736     | Mout1_1              | 1.670608     | 1.357389     | Wdr1_1                | 0.712805     | 2.09768      |
| Mist1b_1              | 4.20245      | 1.251207     | Slamf8_1             | 2.335795     | 2.152323     | Nkx1b_1              | 1.669253     | 0.883143     | Bgntm1_1              | 0.686851     | 0.662339     |
| lapp1_1               | 4.188857     | 1.805418     | Gat1_1               | 2.33068      | 0.974301     | Nippapab3_1          | 1.669002     | 1.161948     | Nran1_1               | 0.666169     | 0.901352     |
| Rgs1_1                | 4.152895     | 1.212626     | Rubt1_1              | 2.317103     | 1.031023     | Rmgp2_1              | 1.667103     | 1.711755     | Sirt1b_1              | 0.661718     | 0.911444     |
| Fgr2b_2               | 4.111064     | 1.756308     | Abcb4_1              | 2.316676     | 1.403753     | Fgfr1a_1             | 1.66485      | 0.991694     | Ier1_1                | 0.661375     | 0.993161     |
| Skat1_1               | 4.094703     | 1.442105     | Ragap1_1             | 2.315945     | 1.31288      | Npcr_1               | 1.662883     | 1.461546     | Gn1_1                 | 0.660268     | 0.866847     |
| Kntm1_1               | 4.089966     | 1.39522      | Fetua_2              | 2.311867     | 1.752118     | Chst1_1              | 1.66175      | 1.33352      | Ecm1_1                | 0.658463     | 0.880777     |
| Cenpw_1               | 4.074147     | 1.569915     | KRXL1_1              | 2.308488     | 1.308359     | ENSRNOG00000000787_1 | 1.660348     | 1.067655     | Wdr1_1                | 0.656731     | 0.652344     |
| Famil11a_1            | 4.015862     | 1.538291     | Sod1_1               | 2.303123     | 1.118497     | Mnrl1_1              | 1.659569     | 1.439641     | Veg1a_1               | 0.656454     | 0.927588     |
| Dl1_2                 | 4.014703     | 1.347396     | Duo1_1               | 2.301103     | 2.48377      | Chk1_1               | 1.654621     | 1.045896     | Dmnpb_1               | 0.656252     | 1.551283     |
| Cd8a1_1               | 3.955501     | 1.42584      | Dnrl1_1              | 2.300503     | 0.989877     | MHO2_1               | 1.651177     | 1.053896     | NKX2_1                | 0.654662     | 0.910857     |
| C2orf1_1              | 3.877653     | 1.317787     | Irga1_1              | 2.299914     | 0.860934     | Birc1_1              | 1.651005     | 0.870333     | RAP1GAP_1             | 0.653545     | 1.028256     |
| ENSRNOG00000032086_1  | 3.86441      | 0.818377     | Fabp5_1              | 2.291457     | 1.545776     | Polr2h_1             | 1.643156     | 0.894383     | rXs_1                 | 0.653349     | 1.203874     |
| Cenph_2               | 3.858102     | 1.805418     | Gims1_1              | 2.289277     | 0.889524     | Polr2h_1             | 1.643156     | 0.894383     | G04897                | 0.649887     | 0.966442     |
| Cenph_2               | 3.858102     | 1.805418     | Dccr1_1              | 2.271283     | 1.031023     | Pmaip1_1             | 1.642137     | 1.738149     | ENSRNOG00000000787_1  | 0.649887     | 0.966442     |
| Cenp1_1               | 3.805105     | 1.305878     | Fgl1_1               | 2.270727     | 0.874259     | Fgfr1a_1             | 1.637011     | 1.194587     | Dir1_1                | 0.645727     | 1.089013     |
| Cd2_1                 | 3.770568     | 1.517956     | Frrb_1               | 2.262635     | 1.020941     | Klf18a1_1            | 1.629027     | 0.845359     | Jaag1_1               | 0.640226     | 1.066814     |
| ENSRNOG000000028690_1 | 3.754003     | 0.979376     | Pkar1p_1             | 2.260909     | 2.270945     | TRPM1_1              | 1.627236     | 1.721471     | Wdr7_1                | 0.638402     | 1.077743     |
| Hfr1_1                | 3.740531     | 1.370388     | Hax1_1               | 2.257807     | 1.020941     | Argp1_1              | 1.626573     | 1.540765     | Duo1_1                | 0.638293     | 0.848233     |
| RGD1305807_1          | 3.730843     | 2.38053      | 224c83               | 2.20839      | 1.20839      | ARGP1_1              | 1.626577     | 1.250477     | MOXB1_1               | 0.627153     | 1.054411     |
| Cenpa_1               | 3.716658     | 1.349919     | RPS2-PSE_1           | 2.204729     | 0.989894     | z3h12a1_1            | 1.625778     | 1.158549     | Pfmr2_1               | 0.624197     | 2.138407     |
| S100b_1               | 3.715908     | 1.480705     | Cenpe_1              | 2.202597     | 1.272401     | Meif2_1              | 1.625137     | 0.948796     | ACSM1_1               | 0.620066     | 1.007094     |
| Wt1_1                 | 3.689264     | 1.531223     | Argp1_1              | 2.194134     | 1.299183     | MeiA1_1              | 1.62331      | 1.755807     | Car1_1                | 0.614859     | 1.051068     |
| Tgfr1_1               | 3.658248     | 0.853625     | Tspan11_1            | 2.18529      | 1.98214      | Altp13a1_1           | 1.621753     | 1.109735     | Dlg5_1                | 0.611259     | 1.222118     |
| Ank1_1                | 3.645228     | 1.793986     | Hbb_1                | 2.175444     | 1.164282     | Fdps_1               | 1.619352     | 1.058366     | Kn3k2_1               | 0.610491     | 0.879552     |
| Sytl2_1               | 3.630221     | 1.956565     | Fam64b_1             | 2.173787     | 1.031023     | Lgals1_1             | 1.617827     | 1.540765     | ENSRNOG00000000787_1  | 0.607578     | 1.537324     |
| Myh2_1                | 3.588242     | 1.97864      | ENSRNOG00000045712_1 | 2.165851     | 1.034311     | Krk_1                | 1.61753      | 1.487202     | Balz_1                | 0.606474     | 0.914777     |
| E2f1_1                | 3.586105     | 1.040644     | Trem3_1              | 2.162831     | 1.297484     | C2_1                 | 1.615423     | 1.260562     | Garem1_1              | 0.603528     | 0.822398     |
| Nufr1_1               | 3.54149      | 1.257994     | Ckap2_1              | 2.155895     | 1.216657     | Spc24_1              | 1.610811     | 1.347881     | Hoxd2_1               | 0.598855     | 0.958294     |
| Gpr118_1              | 3.529178     | 1.030591     | Amic1_1              | 2.156487     | 1.295147     | Amic1_1              | 1.610114     | 1.183788     | ENSRNOG00000000787_1  | 0.597346     | 0.946294     |
| Rna12c_1              | 3.472356     | 1.627694     | Mcm5_1               | 2.142609     | 1.124269     | Mcm6_1               | 1.608811     | 1.070549     | gpn905_1              | 0.59358      | 0.936465     |
| Llrb1a_1              | 3.443962     | 1.207591     | SAA1_1               | 2.104795     | 1.00158      | Cd121_1              | 1.607357     | 1.207479     | Zfp385d_1             | 0.592205     | 0.716407     |
| C1_1                  | 3.406506     | 1.484234     | LY6L_1               | 2.10347      | 1.031023     | Tact1_1              | 1.605713     | 1.090609     | ENSRNOG00000000787_1  | 0.591623     | 1.537324     |
| Ccn1_1                | 3.443496     | 1.659612     | Irgam1_1             | 2.101818     | 1.118497     | Cd121_1              | 1.605539     | 1.212713     | CLEC2L_1              | 0.581206     | 1.190345     |
| C1_1                  | 3.441645     | 1.639383     | Cdc45_1              | 2.10085      | 1.134511     | Sic16a1_1            | 1.605227     | 1.218584     | Tmem200b_1            | 0.580373     | 0.933313     |
| Pk1_1                 | 3.426253     | 1.332084     | Cdh17_1              | 2.097059     | 1.331028     | Cic16a1_1            | 1.603742     | 1.218983     | Fam107a_1             | 0.579211     | 1.076139     |
| Ford1_1               | 3.410428     | 2.360254     | Gk_1                 | 2.092788     | 1.356868     | RHO1_1               | 1.603456     | 1.227066     | ENSRNOG00000000787_1  | 0.579211     | 1.076139     |
| Exo2_1                | 3.391539     | 1.084861     | Afhgap11a_1          | 2.08196      | 1.090508     | Flox1_1              | 1.59841      | 0.895617     | Adf1_1                | 0.573388     | 0.936392     |
| CDK9_1                | 3.38405      | 1.169371     | Clec10a_1            | 2.06516      | 1.321639     | Sik13a2_1            | 1.598114     | 1.834104     | RGD156237b_1          | 0.572194     | 1.071113     |
| Sapo2_1               | 3.377529     | 1.304637     | C1orf1_1             | 2.053205     | 1.147906     | Hfr1_1               | 1.597445     | 1.190645     | Pfkfb3_1</            |              |              |

# Supplementary Figure 4

## IPA Predicted from mRNA-SEQ

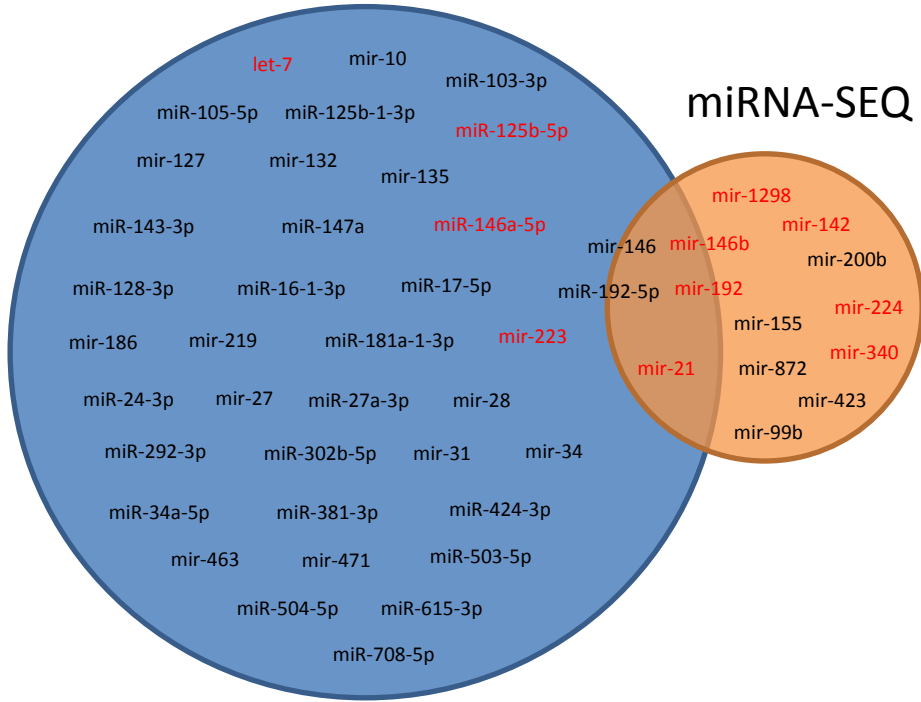

### Supplementary Figure 4; Criteria to select miRNA for PCR Analysis:

The gene set (553 mRNA genes,  $p < 0.01$  based on groups of Day 1 only) selected from mRNA sequencing analysis was put into IPA to obtain the prediction of relevant miRNA genes. There were 40 miRNA genes output, as shown in the blue part of the Venn diagram. The miRNA genes with activation z-score either above 2 or below -2 are highlighted in red. In addition, the set of 12 miRNA genes extracted from Qlucore analysis ( $q < 0.05$ ) (Figure 2C) were plotted in the orange part of the Venn diagram, (those with fold changes over 1.5 and counts over 50 (based on groups of Day 1 only) are highlighted in red). The Venn diagram was used to depict intersections between the two groups. Three of the miRNA genes (mir146, mir192, and mir21) were highlighted in both analyses and thus were selected for PCR analysis in the in vitro sample analysis.

# Supplementary Figure 5

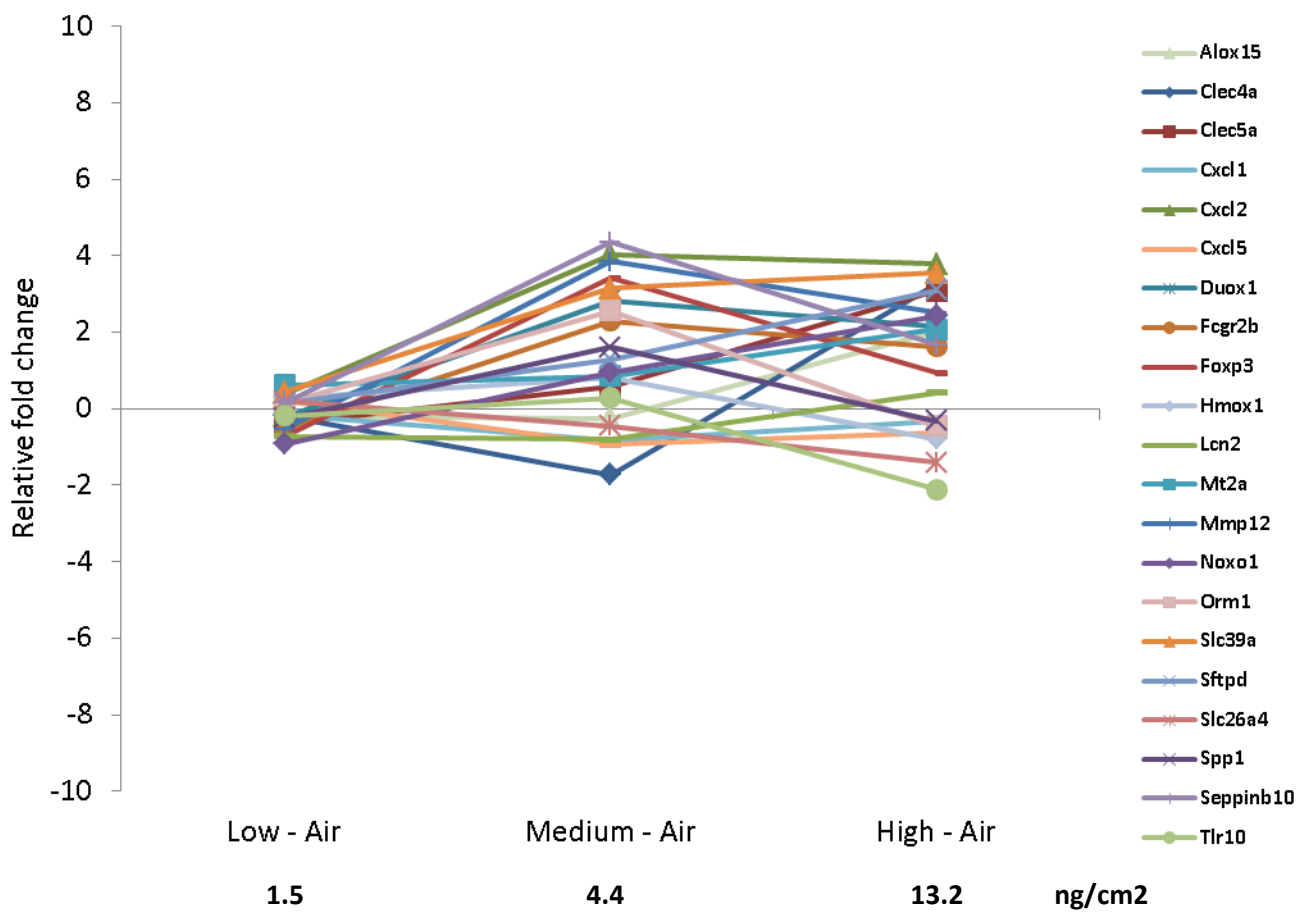

**Supplementary Figure 5** Sensitivity of a set of Stress Response genes to air exposure in SmallAIR cultures in AE-ALI system.

## Supplementary Figure 6

| Transcript ID | Fold Change Day 1 | Fold Change Day 1 | Consistent change |
|---------------|-------------------|-------------------|-------------------|
| Mt1a_1        | 3.689264366       | 3.79331381        | 1.028203304       |
| Chia_1        | 2.495582289       | 2.621564085       | 1.050481924       |
| Hk3_1         | 2.348183669       | 2.586372925       | 1.10143553        |
| Klk13_1       | 2.308358711       | 3.589327716       | 1.55492632        |
| Duox1_1       | 2.301102831       | 2.453503912       | 1.066229583       |
| Prkar1b_1     | 2.260909176       | 2.571882764       | 1.1375436         |
| Gpnmb_1       | 2.246283023       | 2.287372868       | 1.018292372       |
| KNG1L1_1      | 2.132835621       | 2.038910399       | 0.955962278       |
| Ly6i_1        | 2.103740195       | 2.062465304       | 0.980380234       |
| Fcrlb_1       | 1.849340913       | 2.07372178        | 1.121330181       |
| Slc7a7_1      | 1.830903224       | 1.877904092       | 1.025670864       |
| Cd68_1        | 1.730321599       | 1.821021155       | 1.052417745       |
| Kng1l1_1      | 1.711105938       | 2.283995113       | 1.334806374       |
| Pmaip1_1      | 1.642407653       | 1.848241397       | 1.125324394       |
| Folr1_1       | 1.626753054       | 1.628737609       | 1.001219948       |
| S100b_1       | 0.594138534       | 0.521361793       | 0.877508802       |

**Supplementary Figure 6.** Summary of RNA-SEQ identified transcripts, which were consistently regulated within lung tissue to the same level by AgNPs across Day and Day 7 post exposure.
