# Supplementary material
Source: PubMed Central journal article supplement (PMC6407131)
Supplement: NIHMS1009968-supplement-Suppl-Methods.pdf [file NIHMS1009968-supplement-Suppl-Methods.pdf]

## SUPPLEMENTARY METHODS

### ***AE-ALI system exposure duration estimation***

The previous *in vivo* AgNP exposure study (Seiffert *et al.*, 2016) estimated an alveolar dose of 19 µg AgNPs (equivalent to approximately  $1.3 \times 10^{12}$  particles) per rat. Values in the literature for rat lung surface areas show some variation (e.g. 0.29 m<sup>2</sup> to 0.55 m<sup>2</sup> Frochlich *et al.*, 2016), however, assuming an indicative alveolar surface area of 0.4 m<sup>2</sup>, (Ji and Yu, 2012) gives a deposition of approximately 5 ng/cm<sup>2</sup> or 3 particles/µm<sup>2</sup> which, assuming a cell diameter of around 20 µm, equates to approximately one thousand particles per cell. The objective for the AE-ALI exposures was to expose cell cultures to three different doses: a level approximating the *in vivo* study and a lower (x 0.3) and higher (x 3) dose. The intention was to use the same aerosol for all exposures so the deposited dose was controlled by varying the exposure duration. The required exposure duration in each case, T (mins), was estimated using the following formula:  $T = (D \times A)/(MC \times FL \times DEff)$ , where D (ng/cm<sup>2</sup>) is the desired dose level, A (cm<sup>2</sup>) is the surface area of the exposed area of cells (diameter 6.5 mm), MC is the aerosol mass concentration (µg/m<sup>3</sup>), FL (L/min) is the aerosol flow rate to the cells (0.005 L/min), and DEff is the deposition efficiency, 0.39, which was derived from (Aufderheide *et al.*, 2011). Mass concentration was calculated as described (Seiffert *et al.*, 2016) gravimetrically using Pallflex® emfab™ filters (Pall Life Sciences, Ann Arbor, MI, USA) with the aerosol drawn at 2 L min<sup>-1</sup> with continuous monitoring using a TEOM™ ambient particulate monitor (Model 1400a, Thermo Scientific, Franklin, MA, USA).

### ***Laser ablation ICP-MS measurements***

Laser ablation inductively coupled plasma mass spectrometry (LA-ICPMS) analyses of samples of lung tissue sections mounted on microscope slides were undertaken using a New Wave Research NWR213 laser ablation system (Electro Scientific Industries, Portland, Oregon, USA) linked to a iCAP Q ICPMS (Thermo Fisher Scientific, Hemel Hempstead, UK). Laser ablation conditions comprised 5 µm diameter spot size, fluence 10 J/cm<sup>2</sup>, 25 µm s<sup>-1</sup> scan speed and a repetition rate of 20Hz. The cell gas was helium which was run at a flow of 0.9 mL min<sup>-1</sup>. Helium was also used as the collision gas in KED mode. Sample was introduced into the ICP-MS via a micro flow nebuliser. The ICP-MS was run in KED mode and the isotopes monitored were <sup>13</sup>C and <sup>107</sup>Ag. Dwell time for each isotope was 0.05 s. Scan log files were generated to allow reconstruction of the data into an image. Image generation was achieved using Iolite v3 (Paton *et al.*, 2011) within Igor Pro 6.36 (Wavemetrics Inc. Oregon, USA). Basically, scan log file was aligned with the ICP-MS data exported from Qtegra as an excel .csv file, to identify data of interest. Baseline values were then subtracted using the data reduction scheme using

$^{13}\text{C}$  as the index channel. For quantification of Ag relative to control  $^{107}\text{Ag}$  and  $^{13}\text{C}$  content were analysed across 4 different transverse lines through 3 different airway walls for both bronchiolar and alveolar structures (n=3 animals).  $^{13}\text{C}$  was used as a spatial quantitative reference for the amount of tissue present within the ablated samples. Ag was used as a representative isotope of Ag present as either AgNPs or Ag<sup>+</sup> ions.

### ***Ag content determined by ICP-MS***

Transwell inserts (diameter in 6.5 mm) without cells were exposed to AgNPs in the AE-ALI system. The membranes were digested by acidification of each sample with 1 mL of 20% nitric acid and using an UltraWAVE™ microwave digester with 22 position rack, 660 terminal and easyCONTROL software. Then the samples were heated for 25 min at 200°C, a pressure of 160 bar and a power of 1500 W. Once cooled, samples were filtered with a 200 nm syringe filter, diluted with 10 mL deionized water and stored at room temperature. Total Ag content was measured by an iCAP Q ICP-MS (Thermo Fisher Scientific, Hemel Hempstead, UK). The ICP-MS was run in KED mode and the isotopes monitored were  $^{107}\text{Ag}$  and Ir-193, which was used as an internal standard. Calibration standards (0 – 10 µg/L) were prepared from a Spex CertPrep 10 mg/L stock solution.

### ***Lactate Assay***

The lactate assay is based on the conversion of lactate to pyruvate by lactate dehydrogenase (LDH) activity reducing NAD to NADH. NADH reduces N-Methylphenazonium methyl sulphate (PMS) to PMSH which reduces p-iodonitrotetrazolium violet (INT) to INT<sub>H</sub>. The lactate reaction mixture was TRAM buffer (82 mM Triethanolamine HCl, 8.2 mM EDTA.Na<sub>2</sub>, 32 mM MgCl<sub>2</sub>.6H<sub>2</sub>O) and colour reagent (0.3 mM PMS and 0.75 mM INT, 9.5% ethanol, 0.4% Triton-X-100, 4.5 mM β-NAD and 2 U/ml LDH). Lactate was determined by adding 20 µl supernatant to 150 µl reaction mixture for 30 min. The absorption of the colour product (INT<sub>H</sub>) was measured at 490 nm. A lactate standard curve with a spline fit curve was used to determine lactate concentrations from the unknown values. Assays were performed in 96-well black-side and clear-bottom plates.

### ***PCR Primer details***

Table Primers applied in real-time PCR analysis for mRNA gene expression

|         |                           |         |                          |
|---------|---------------------------|---------|--------------------------|
| HPRT1 F | TCAGGCAGTATAATCCAAAGATGGT | HPRT1 R | AGTCTGGCTTATATCCAACACTCG |
|---------|---------------------------|---------|--------------------------|

|            |                            |            |                         |
|------------|----------------------------|------------|-------------------------|
| Alox15 F   | CCGACCTCGCTATCAAAGACT      | Alox15 R   | CACCAGAAAATCCGGTTGAAGT  |
| Batf F     | ATCTGATGATGTGAGAAGAGTTC    | Batf R     | TTCTGTGTCTGCCTCTGT      |
| C3 F       | GAGCCAGGAGTGGACTATGTGTA    | C3 R       | CAATGGCCATGATGTACTCG    |
| Ccl17 F    | GAAGAAGAGCCACAGTGA         | Ccl17 R    | AGGATAAAGACTTTAATCTGGG  |
| Ccl2 F     | TTTAGATACAGAGACTTGGG       | Ccl2 R     | CAAAGACCCTCAAACATC      |
| Ccl22 F    | TCCTTGTGCTCCCAAAGTGC       | Ccl22 R    | AGGAAATGTAAGCAGACACG    |
| Ccl24 F    | CCTAAGGCAGGAGTGGTCTT       | Ccl24 R    | AGGGCTTTGGTGCTCATTG     |
| Ccl7 F     | CCAATGCATCCACATGCTGC       | Ccl7 R     | GCTTCCCAGGGACACCGAC     |
| Cd177 F    | CCTTGCTACCCTGTGTCCCAGC     | Cd177 R    | GGCAACCCTCGTAACTCTGC    |
| Cep55 F    | AAATAACACAGTTGGAATCCTTGAA  | Cep55 R    | TCAGTCTCTCTTGAAAGTGAC   |
| Chi3l1 F   | TGCCCTTGACCGCTCCTCTGTACC   | Chi3l1 R   | GAGCGTCACATCATTCCACTC   |
| Chia F     | GTCAACTCGGCCATCAGGTT       | Chia R     | CAAGGTCAAGGCCGTCAA      |
| Clec10a F  | AGCTGAGGTGGAGGGTTTC        | Clec10a R  | GTGTGCCTTCTGCGTAGTG     |
| Clec4a F   | GACCCTCACACTCAGATCATC      | Clec4a R   | ACGTGGCTCAGCCACTC       |
| Clec5a F   | GGACATAACTGATGCTGAG        | Clec5a R   | ATTCTGATTCTGATTGGTAACA  |
| Cxcl1 F    | AACCGAAGTCATAGCCACAC       | Cxcl1 R    | GTTGGATTTGTCAGTGTTCAGC  |
| Cxcl2 F    | CGCTGTCAATGCCTGAAG         | Cxcl2 R    | GGCGTCACACTCAAGCTCT     |
| Cxcl5 F    | TGGACGGTGGAAACAAGG         | Cxcl5 R    | CTTCCCTGGGTCAGAGAC      |
| Defb4 F    | GAAGCTCCCAGCCATCAGCCR      | Defb4 R    | GTCGCACGTCTCTGATGAGGGA  |
| Duox1 F    | TAAAGTCCATGAAGGGTCTC       | Duox1 R    | CCAACCAGAAGTGTCCAT      |
| Fabp5 F    | AATTAGTGGTGGAGTGTG         | Fabp5 R    | AGAAAGAAACAGTATGGAGAT   |
| Fcgr2b F   | CCCTAGCTCCAGCTCTTCA        | Fcgr2b R   | TGCAGTAGATCAAGGCCACTACA |
| Foxp3 F    | TGCAGGGCAGCTAGGTACTTG      | Foxp3 R    | TCGGAGATCCCCTTTGTCTTATC |
| Hmox1 F    | TCACTGTGTCCCTCTCTC         | Hmox1 R    | ATTGCTGGATGTGCTTT       |
| Il1b F     | CCACATTCTGATGAGCAACC       | Il1b R     | GAGAGCACACCAGTCCAA      |
| Il1r2 F    | TTTCTGCCTTCACCTTCAG        | Il1r2 R    | GGCACCTCAGGGCTACAG      |
| Ilgam F    | AAACCACAGTCCCGCAGAGA       | Ilgam R    | CGTGTTACCAGCTGGCTTA     |
| Lcn2 F     | AGACAAAGACCCGCAAAG         | Lcn2 R     | TGGCAACTGGAACAAAAG      |
| Lilrb4 F   | CTGTGTCACTCACGGAGCC        | Lilrb4 R   | GCAGGTAGTGGGAGAAGCC     |
| Mmp12 F    | GCTAGAAGCAACTGGGCAAC       | Mmp12 R    | ACCGCTTCATCCATCTTGAC    |
| Mreg F     | GAGCCCTCGTCAGTGATAA        | Mreg R     | TGAGCTTCTGCCACTCCTCT    |
| Mt1a F     | GCAAATGCAAAGAGTGCAAA       | Mt1a R     | CAGCTGCACCTTCTCTGATGC   |
| Mt2A F     | TGCAGCGATCTCTCGTTGAT       | Mt2A R     | AGCAGGATCCATCTGTGGCA    |
| Muc1 F     | AGAGAAGTTCAGTGCCCAGC       | Muc1 R     | TGACATCCTGTCCCTGAGTG    |
| Noxo1 F    | AGATCAAGAGGCTCCAAACG       | Noxo1 R    | AGGTCTCCTTGAGGGTCTTC    |
| Orm1 F     | ATGTCAACTGGTCCGGAAGGACA    | Orm1 R     | TTTCAGGTTCCAGGGATCCTCTT |
| Rnase9 F   | CTGGTGCAGTTTCAAGAGGTG      | Rnase9 R   | TCCCCGGGCTAGGGCGATATGA  |
| S100a9 F   | GCTCCTCGGCTTTGACAG         | S100a9 R   | TGATGGTCTCTATGTTGCGTTC  |
| Serp1b10 F | GTGACCCTGAAAGTGAAA         | Serp1b10 R | TATATCGCATTGGCTGTT      |
| Sftpd F    | GCTGCTTTCTCTCAGTATAAG      | Sftpd R    | TGCTCCGTAAATGGTTT       |
| Slc26a4 F  | CATCAAGACATATCTCAGTTGGACCT | Slc26a4 R  | ACAGTTCATTGCTGCTGGAT    |
| Slc39a2 F  | GTTTGCCCTGTTGGCTCTCA       | Slc39a2 R  | ATCAATCTGGAACCATTTGAAGC |
| Spp1 F     | CCCACAGACCCTCCAAGTA        | Spp1 R     | GTCATGGAGTCTGGCTGT      |
| Tac1 F     | ACTGTCCGTGCAAAATC          | Tac1 R     | GGGCCACTTGTTTTTCAA      |
| Tac4 F     | GTAGGGCAGGAGGAAGAAGATGT    | Tac4 R     | CAAGGTGGTCAAATGATGATTGT |
| Tlr10 F    | GCCAAGGATAGGCGTAAATG       | Tlr10 R    | ATAGCAGCTCGAAGGTTTGCC   |
| Tnfrsf8 F  | GCTGGGACTGATTCATTCAATC     | Tnfrsf8 R  | CGGACGACCAACCTCCCATG    |
| Trem1 F    | GGCCACACCAACCTTCTG         | Trem1 R    | AGTGCTGCCTCAATGTCTCCA   |
| Trem2 F    | GCATCTTTCTCATCAAGATTCTAGC  | Trem2 R    | CTGGCAGAGTTTGGAGCTGATAC |

## REFERENCES

- Aufderheide, M., Scheffler, S., Mohle, N., Halter, B. & Hochrainer, D., 2011. Analytical in vitro approach for studying cyto- and genotoxic effects of particulate airborne material. *Anal Bioanal Chem*, 401, 3213-20.
- Paton, C., Hellstrom, J., Paul, B., Woodhead, J. & Hergt, J., 2011. Iolite: Freeware for the visualisation and processing of mass spectrometric data. *Journal of Analytical Atomic Spectrometry*, 26, 2508-2518.
- Seiffert, J., Buckley, A., Leo, B., Martin, N.G., Zhu, J., Dai, R., Hussain, F., Guo, C., Warren, J., Hodgson, A., Gong, J., Ryan, M.P., Zhang, J.J., Porter, A., Tetley, T.D., Gow, A., Smith, R. & Chung, K.F., 2016. Pulmonary effects of inhalation of spark-generated silver nanoparticles in Brown-Norway and Sprague-Dawley rats. *Respir Res*, 17, 85.
